# Supplementary material
Source: PubMed Central journal article supplement (PMC4931757)
Supplement: Supp_Data.pdf [file Supp_Data.pdf]

**Paramecium Preparation SOP**  
Mayo Clinic Zebrafish Facility  
Version: December 2015

**1. PURPOSE**

The purpose of this SOP is to describe the preparation routine for paramecium in the Mayo Clinic Zebrafish Facility.

**2. POLICY**

Using properly cultured paramecium, it is the policy of the Mayo Clinic Zebrafish Facility to provide the highest standard of young zebrafish feeding.

**3. DEFINITIONS**

- 3.1. **Paramecium:** any of a genus (*Paramecium*) of ciliate chiefly freshwater protozoans that have an elongate body rounded at the anterior end and an oblique funnel-shaped buccal groove bearing the mouth at the extremity. (<http://www.m-w.com/dictionary/paramecium>)
- 3.1.1. In the Mayo Clinic Zebrafish Facility, paramecium is fed only to young zebrafish from their arrival on the baby system up until post-fertilization day 14.

**4. RESPONSIBILITY**

- 4.1. It is the responsibility of the Animal Care Assistants and Research Technologists employed by the Zebrafish Facility to prepare paramecium each day following the Mayo Clinic Zebrafish Facility SOP.
- 4.2. It is the responsibility of the facility director and facility manager to oversee the adherence and training regarding this SOP.

**5. MATERIAL**

- 5.1. Protozoan pellets (Carolina Biological Supply Company)
- 5.2. Wheat seed (Carolina Biological Supply Company)
- 5.3. 4 to 8 deli containers (and lids), able to hold at least 1,500 mL water
- 5.4. Marking tape (purple, pink, yellow)
- 5.5. 1,000 mL of boiling water per deli container
- 5.6. 10  $\mu$ L pipette
- 5.7. Disposable stir sticks (do NOT reuse! Use one stick per culture)
- 5.8. Petri dishes
- 5.9. Medium-sized brine net
- 5.10. 1000 mL clean glass beaker
- 5.11. Microwave
- 5.12. Heat-protective gloves

**6. Counting Paramecium**

- 6.1. The facility paramecium is located to the left of the fish room entrance on the shelves across from the microscopes.
- 6.2. Each day pull down the week-old paramecium from the shelf above prep area, these will be counted for culture. There will be 4-8 containers.
- 6.3. Stir the week-old paramecium well, and put a line of ten 10  $\mu$ L samples (8

from the perimeter and 2 from the center) using the 10  $\mu$ L pipette onto a petri dish to be counted.

- 6.4. Under the microscope, located right behind prep area, count the total paramecium seen in the samples. Then go through each sample again counting coleps (hopefully there won't be any).
- 6.5. With yellow tape, label each container with the amount of paramecium (and coleps) per 10  $\mu$ L, your initials, and date. Record this same info on the paramecium QC log.
- 6.6. Do this to each container that is 1-week old (usually 4 or 8 containers). Select the best possible count of paramecium. Always select a lower paramecium with ZERO coleps over a high paramecium with any coleps.

### **7. Culturing Paramecium**

- 7.1. Set aside your best count from the week old paramecium, do NOT stir it again. Let the culture "rest" for at least 3 hours. Settling sinks any coleps to the bottom of the container. Even if you didn't see any coleps while counting, use this precaution!
- 7.2. Carefully pour ONLY the TOP 400 to 800ml (depending on the number of media houses) of culture through the net and into the clean 1000ml beaker.
- 7.3. Distribute 100ml of culture into each of the media houses made the day before.
- 7.4. With pink tape, label each container as cultured "C" with the date and your initials.
- 7.5. Place all the cultured containers on the shelf above the prep area.

### **8. Paramecium Media Preparation**

- 8.1. To prepare the next batch of paramecium media "houses", place four to eight clean deli containers in the prep area depending on the day (Mon-Thur 8, Fri-Sun 4).
- 8.2. With purple tape, label them each with "P&W" (meaning, protozoa and wheat), followed by the date and your initials
- 8.3. Place two protozoa pellets in each clean container
- 8.4. Place 20 wheat seeds in each clean container
- 8.5. Fill a separate deli container with 1000ml of fish system water from the hose, NOT the sump! Cover.
- 8.6. Microwave 9 minutes, or until at a rolling boil.
- 8.7. After the water has boiled, and while wearing the protective gloves, immediately dump it into one of the pellet & seed prepped deli containers.
- 8.8. Repeat this step for all prepped containers (4-8 total depending on the day).
- 8.9. Leave the containers to cool overnight. Culture will be added to them the following day.

### **9. TANK LABELS**

- 9.1. Note that labeling paramecium with tape follows certain colors:
  - 9.1.1. **Yellow**= this tag implies that the container has been counted. On this tag, please place the amount of paramecium/coleps counted per 10

- $\mu\text{L}$ , as well as the date and your initials
- 9.1.2. **Pink**= this tag implies that the container has been cultured. On this tag, please write "C" followed by the date and your initials
  - 9.1.3. **Purple**= this tag implies that the container is ready for culturing and contains protozoa and wheat. Please write "P&W" followed by the date and your initials. These containers will be cultured one day after preparation.

## **10. FEED TIME**

- 10.1. Paramecium is fed twice a day during normal feeding hours to fish on the baby rack. **Feed approximately 1ml/ fish in a tank**
- 10.2. Use the paramecium from the beakers above the second sink. It has been harvested into a clean glass beakers by being run through a clean brine net
- 10.3. To fill these beakers use the paramecium containers from the very right side of the shelf above the fridge. Use the oldest, but not if it's over two weeks old!
- 10.4. These need to be rechecked under the microscope for any abnormal cilia, or coleps before being strained into the beakers with brine net.
- 10.5. Always dump any paramecium over two weeks of (cultured) age, and/or containing more than 4 coleps/10  $\mu\text{L}$ .

## **11. CLEAN-UP**

- 11.1. Scrub, then place all containers & beakers in the dishwasher
- 11.2. Rinse and autoclave all nets
